# Supplementary material for: Decreasing Trends of Secondary Primary Colorectal Cancer among Women with Uterine Cancer: A Population-Based Analysis
Source: MDPI journal article supplement (doi:10.3390/jcm8050714), 2019-05-20
Supplement: s1 [file s1]

## **Decreasing trends of secondary primary colorectal cancer among women with uterine cancer: a population-based analysis**

Koji Matsuo, MD, PhD<sup>1,2,\*</sup>; Rachel S. Mandelbaum, MD<sup>1</sup>; Hiroko Machida, MD, PhD<sup>3</sup>; Kosuke Yoshihara, MD, PhD<sup>4</sup>; Franco M. Muggia, MD<sup>5</sup>; Lynda D. Roman, MD<sup>1,2</sup>; Jason D. Wright, MD<sup>6</sup>

1) Division of Gynecologic Oncology, Department of Obstetrics and Gynecology, University of Southern California, Los Angeles, CA, USA.

2) Norris Comprehensive Cancer Center, University of Southern California, Los Angeles, CA, USA.

3) Department of Obstetrics and Gynecology, Tokai University School of Medicine, Kanagawa, Japan.

4) Department of Obstetrics and Gynecology, Niigata University School of Medicine, Niigata, Japan

5) Division of Medical Oncology, Department of Medicine, New York University, New York, New York, USA

6) Division of Gynecologic Oncology, Department of Obstetrics and Gynecology, Columbia University College of Physicians and Surgeons, New York, NY, USA.

### **\* Address correspondence to:**

Koji Matsuo, MD, PhD, Division of Gynecologic Oncology, Department of Obstetrics and Gynecology, University of Southern California, 2020 Zonal Avenue, IRD 520, Los Angeles, CA 90033, USA, Tel: +1-323-409-3416, FAX: +1-323-206-3427, Email: [koji.matsuo@med.usc.edu](mailto:koji.matsuo@med.usc.edu)

**Keywords:** colorectal cancer; uterine cancer; secondary cancer; trend; survival.

Supplemental Figure S1. CONSORT diagram for study schema.

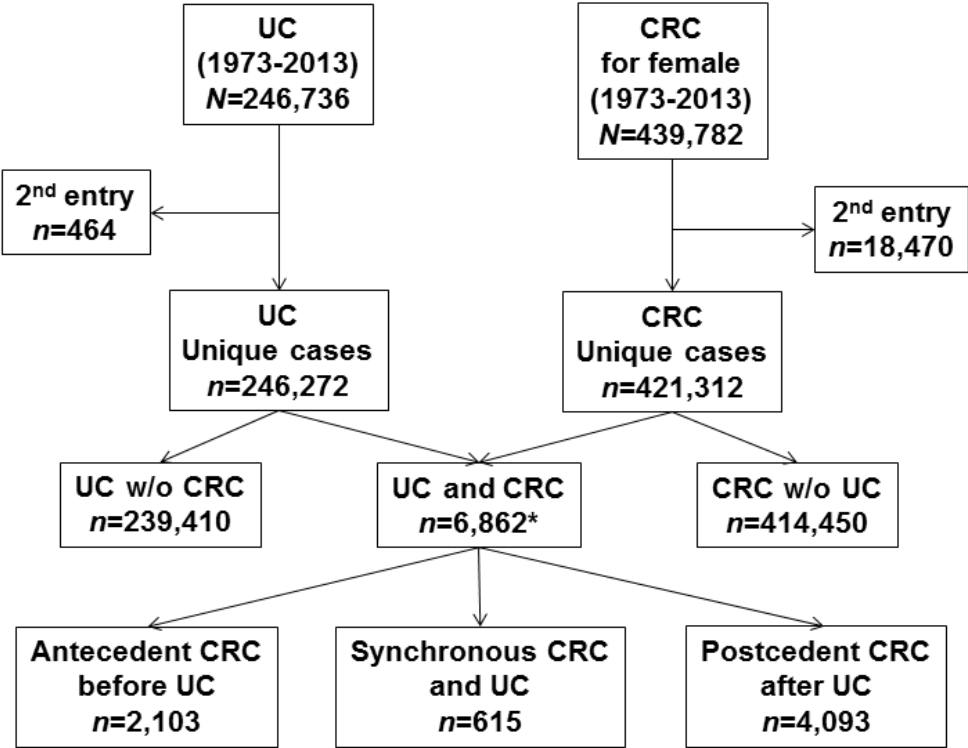

\*51 cases with lack of month information were not assessable for relative time interval between the two cancer diagnoses. Abbreviations: UC, uterine cancer; CRC, colorectal cancer; and w/o without.

**Supplemental Figure S2. Median follow-up time among cancer survivors.**

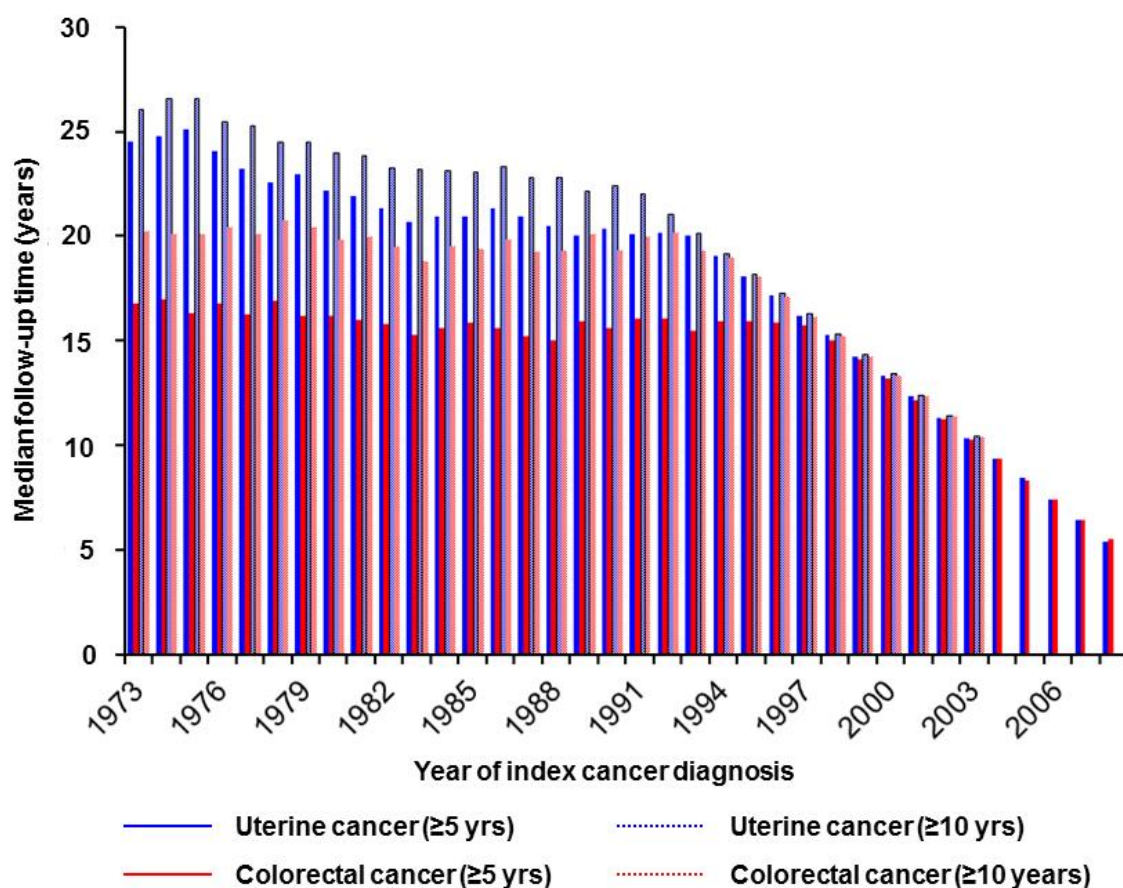

Among  $\geq 5$  years cohort for uterine cancer, the median follow-up time was 11.7 (IQR 8-17.9) years. Among  $\geq 10$  years cohort for uterine cancer, the median follow-up time was 16.0 (IQR 12.4-22.1) years. Among  $\geq 5$  years cohort for colorectal cancer, the median follow-up time was 10.3 (IQR 7.3-14.3) years. Among  $\geq 10$  years cohort for colorectal cancer, the median follow-up time was 14.1 (IQR 11.8-19.1) years. Abbreviations: yrs, years; and IQR, interquartile range.

**Supplemental Figure S3. Trends of postcedent secondary primary cancer among cancer survivors per year stratified chronology.**

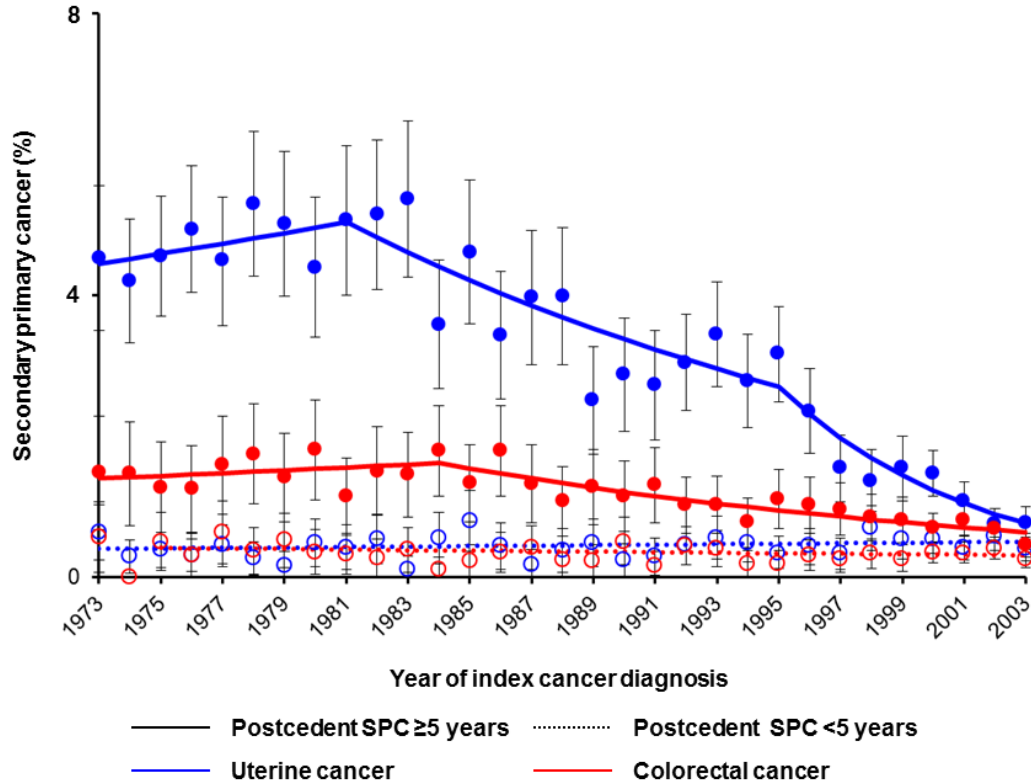

Results of Figure 3A (follow-up  $\geq 10$  years) were further stratified based on the timing of postcedent secondary cancer diagnosis:  $\geq 5$  years (solid lines) *versus*  $< 5$  years (dashed lines) from the index cancer diagnosis. Raw results of temporal trends are shown in Supplemental Table S7.

Supplemental Figure S4. Trends in secondary primary cancer per age.

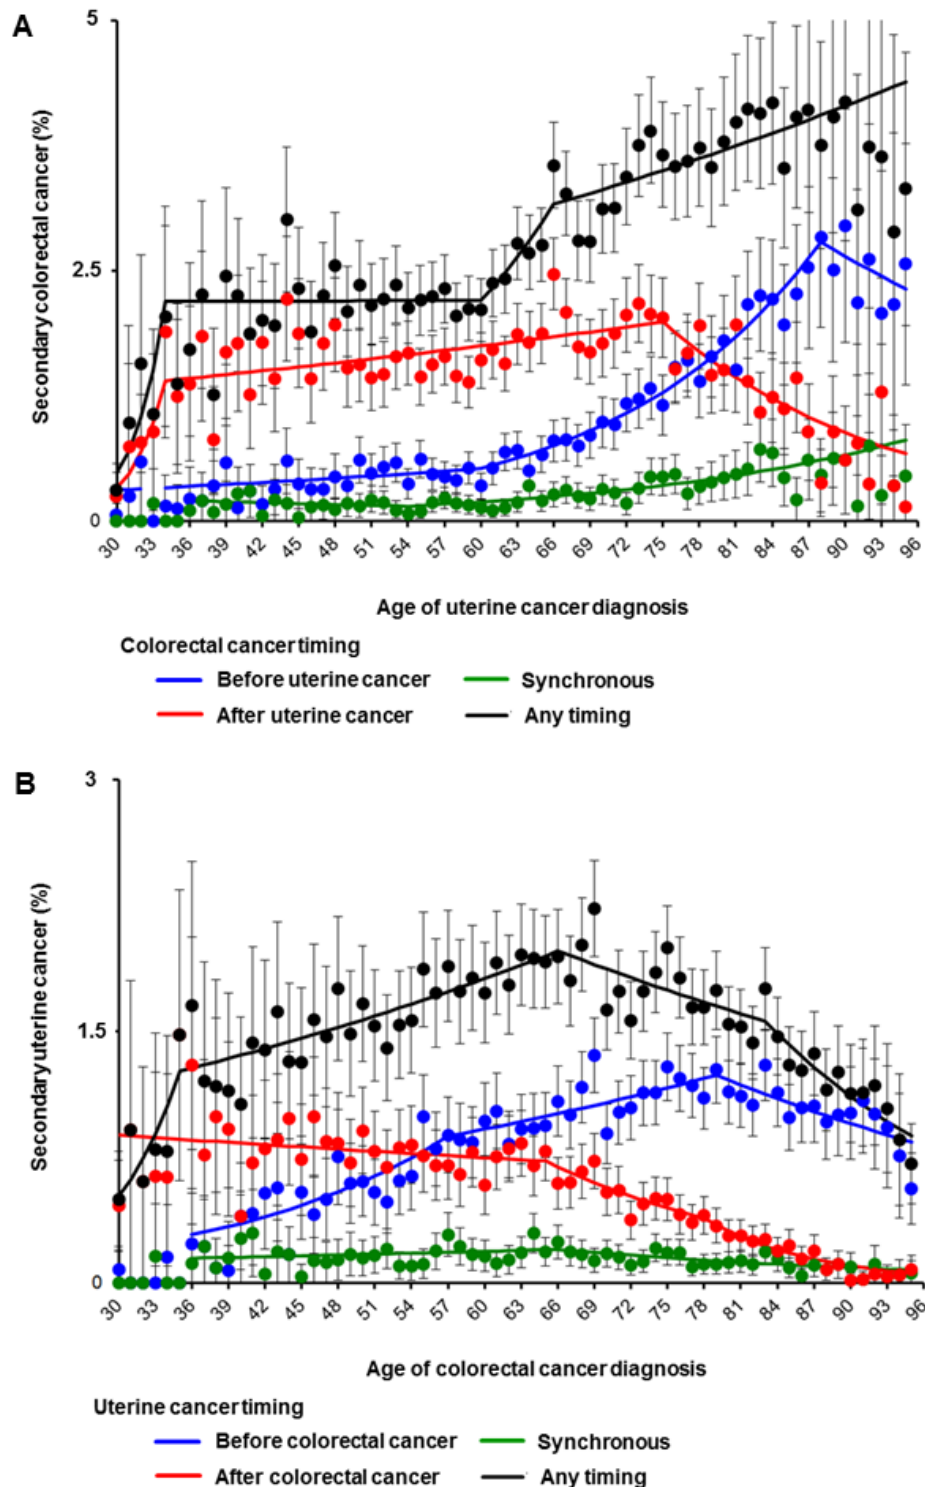

(A) Proportion of uterine cancer women who had secondary colorectal cancer is shown per age. (B) Proportion of colorectal cancer women who had secondary uterine cancer is shown per age. Dots represent actual observed values. Bars represent standard confidence intervals. Colored lines represent modeled lines. Raw results of temporal trends are shown in Supplemental Table S8.

Supplemental Figure S5. Absolute time interval between the two cancer diagnoses per age at the index cancer diagnosis.

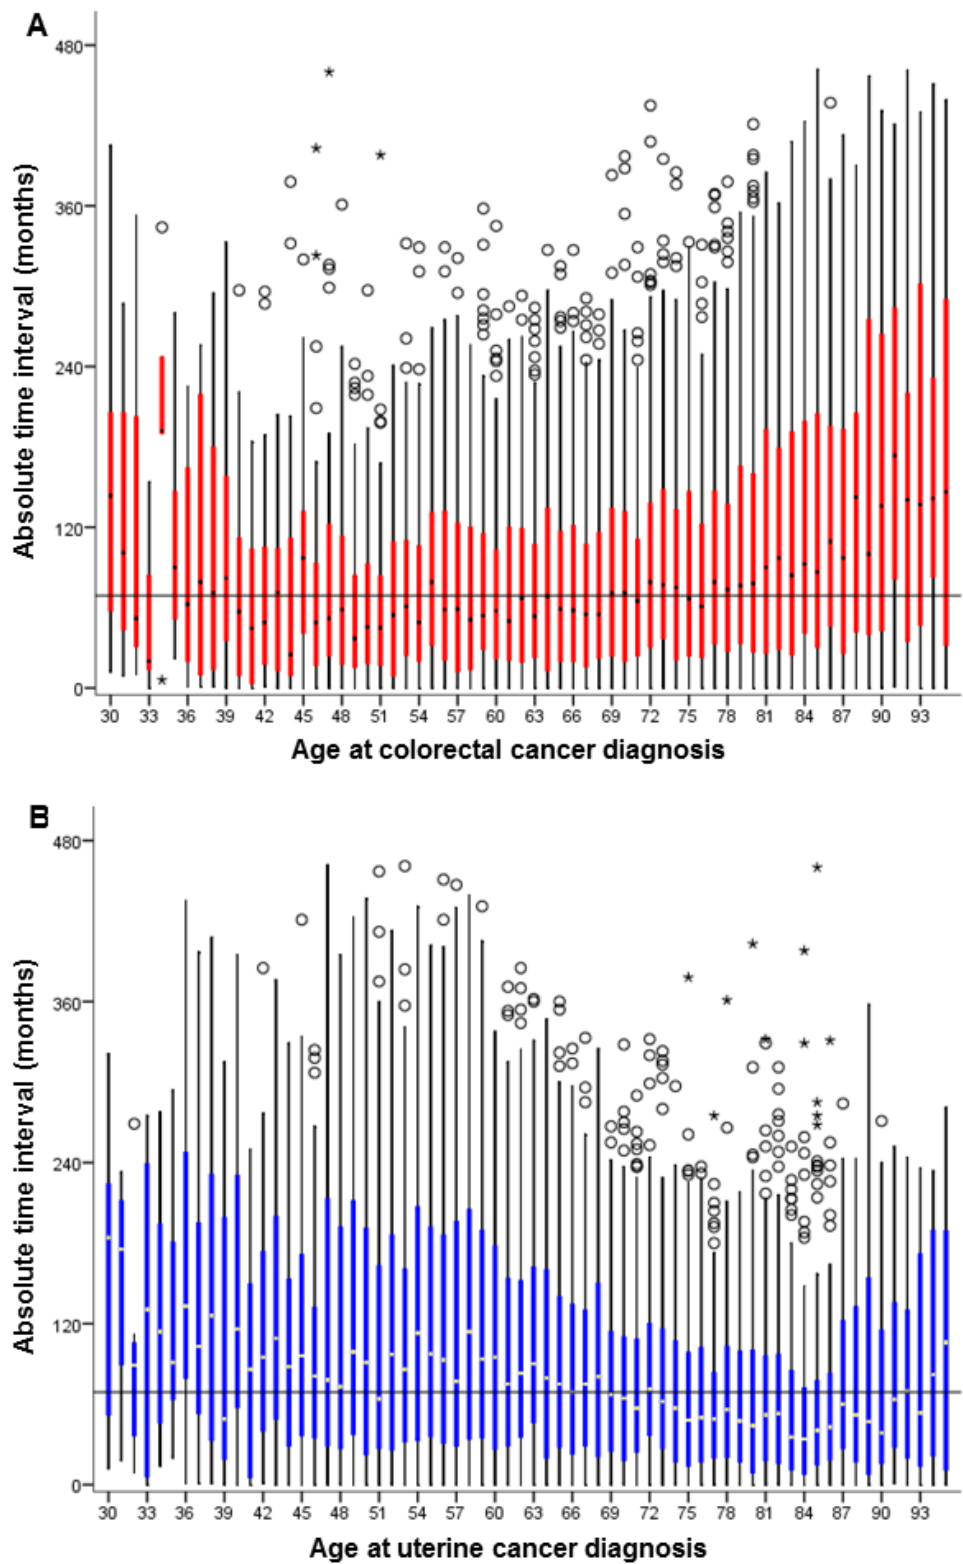

Among 6,811 women who had the two cancer diagnoses, absolute time interval between the two diagnoses is displayed per age at the index cancer diagnosis. **(A)** Absolute time interval to uterine cancer diagnosis is shown per age of colorectal cancer diagnosis. **(B)** Absolute time interval to colorectal cancer diagnosis is shown per age of uterine cancer diagnosis. The horizontal line shows median value of the absolute time interval (5.8 years).

Supplemental Figure S6. Secondary primary cancer-specific survival among survivors.

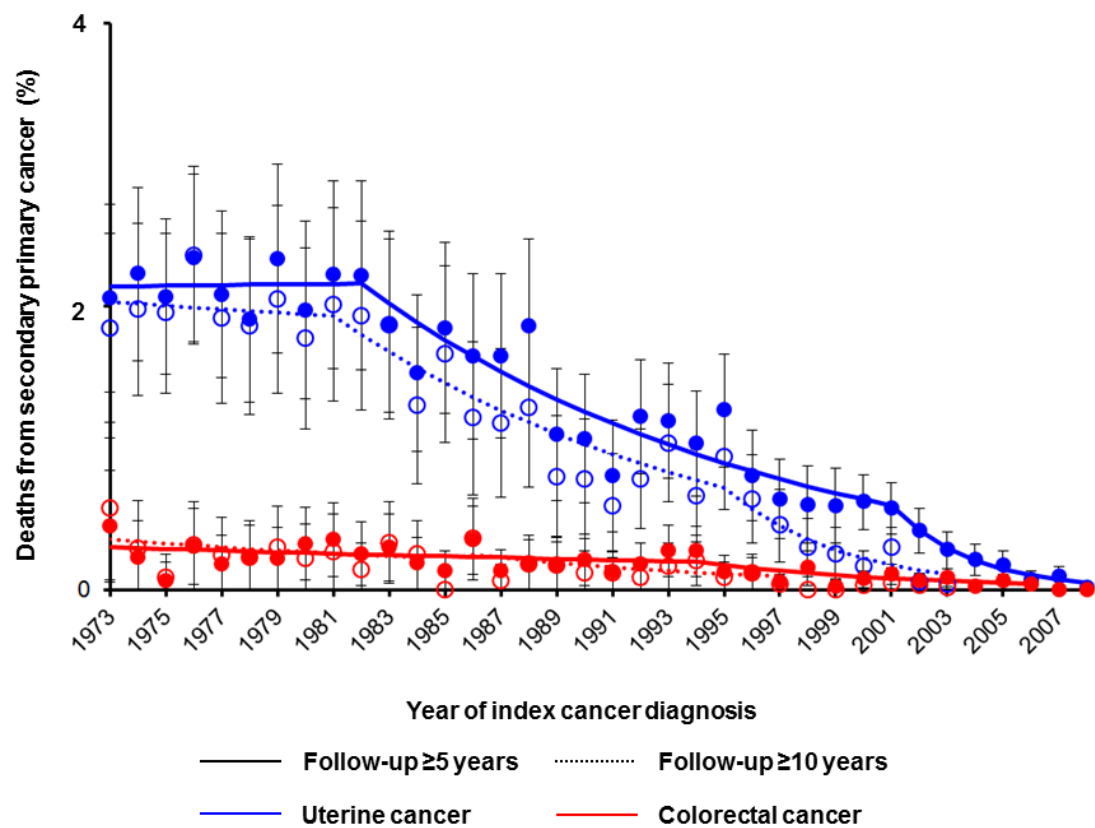

The number of cancer survivors who died of secondary primary cancer per year of index cancer diagnosis is shown for **(A)** secondary colorectal cancer deaths among uterine cancer survivors and **(B)** secondary uterine cancer deaths among colorectal cancer survivors. Raw results of temporal trends are shown in Supplemental Table S9.



Supplemental Figure S7. Secondary colorectal cancer among endometrial cancer.

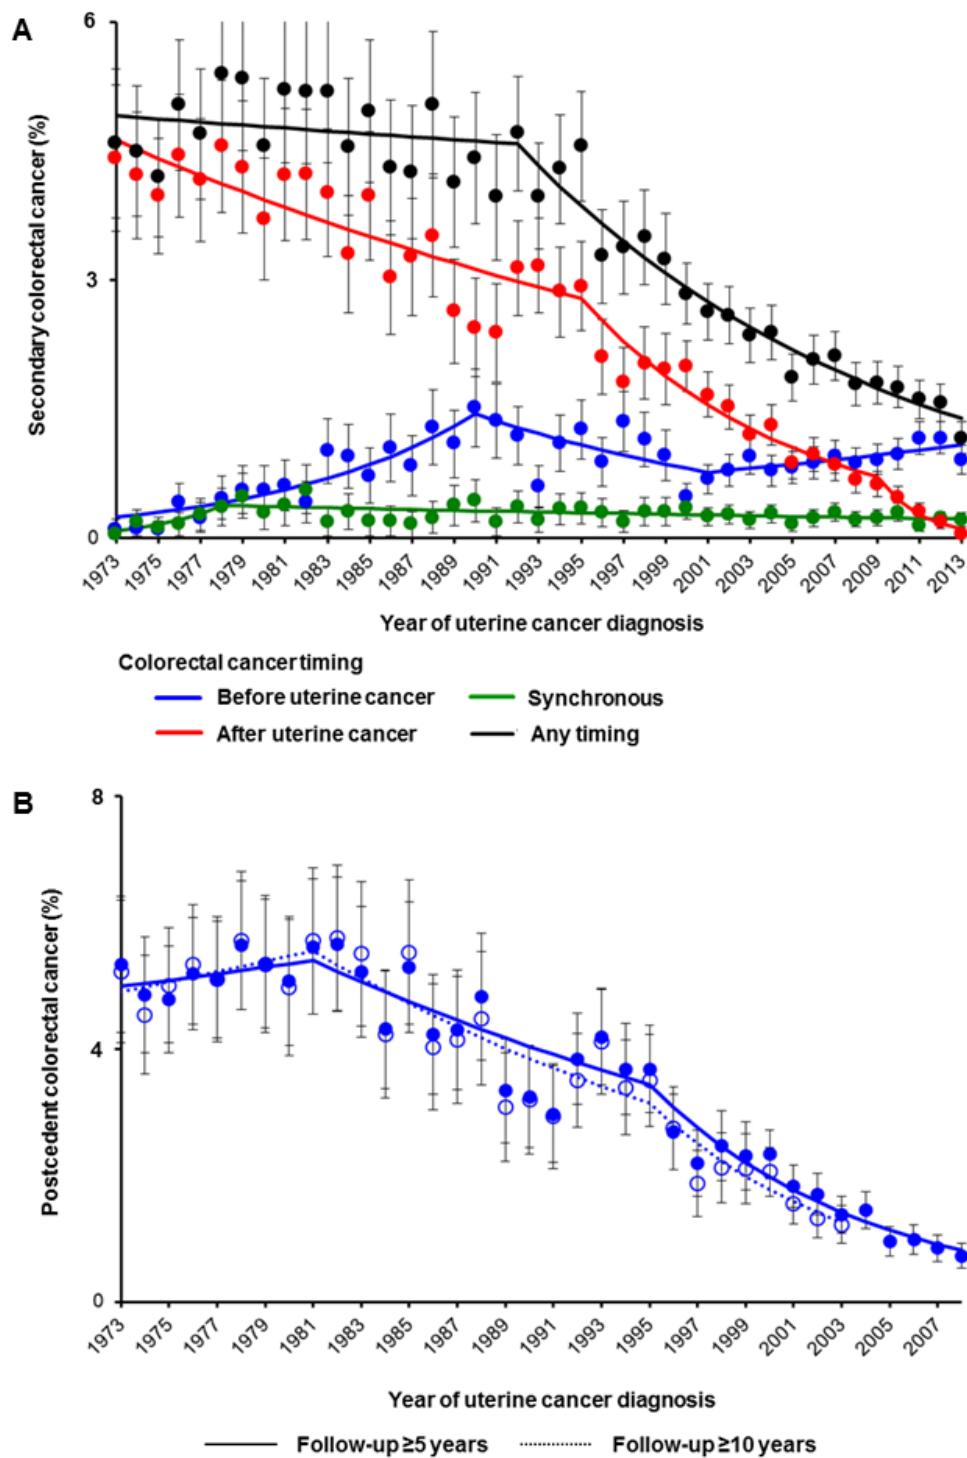

(A) Temporal trends are shown for secondary colorectal cancer among endometrial cancer based on the timing of secondary colorectal cancer. (B) Among women with endometrial cancer who did not die of disease and had follow-up  $\geq 5$  years (solid lines) or  $\geq 10$  years (dashed lines), temporal trends of the

incidence of postcedent colorectal cancer were examined. Dots represent actual observed values. Bars represent standard confidence intervals. Colored lines represent modeled lines. Raw results of temporal trends are shown in Supplemental Table S10-11.

Supplemental Figure S8. Secondary colorectal cancer among endometrioid type endometrial cancer.

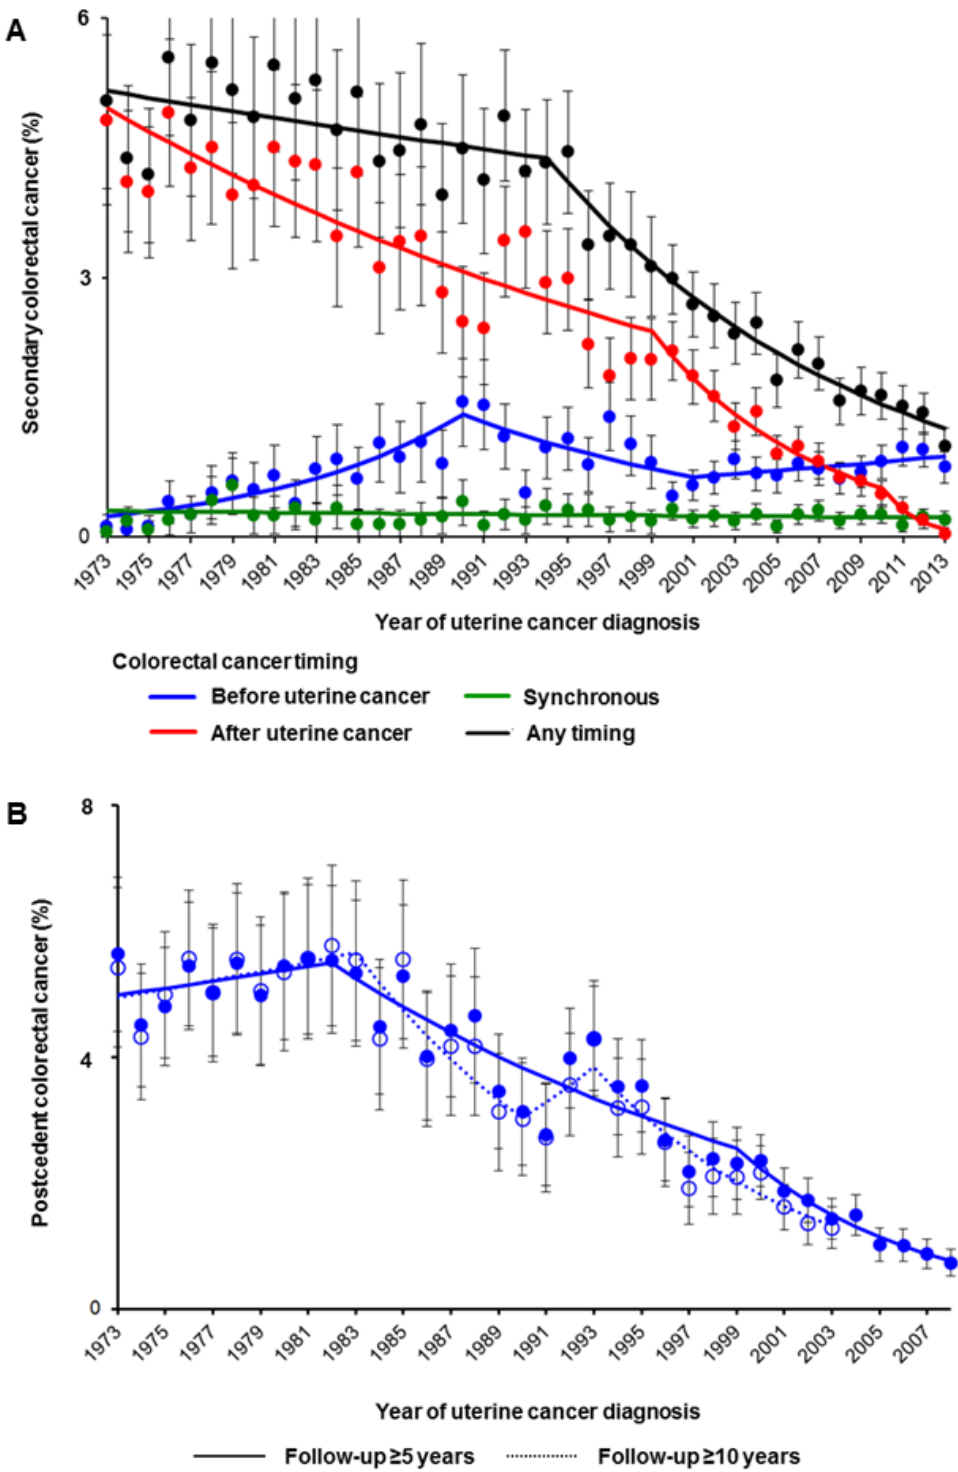

(A) Temporal trends are shown for secondary colorectal cancer among endometrioid type endometrial cancer based on the timing of secondary colorectal cancer. (B) Among women with endometrioid type

endometrial cancer who did not died of disease and had follow-up  $\geq 5$  years (solid lines) or  $\geq 10$  years (dashed lines), temporal trends of the incidence of postcedent colorectal cancer were examined. Dots represent actual observed values. Bars represent standard confidence intervals. Colored lines represent modeled lines. Raw results of temporal trends are shown in Supplemental Table S12-13.

**Supplemental Table S1. Patient demographics (endometrial cancer cohort).**

| Characteristic                    | No CRC          | Antecedent-CRC   | Synchronous-CRC | Postcedent-CRC   | P-value          |
|-----------------------------------|-----------------|------------------|-----------------|------------------|------------------|
| Number                            | n=220,741       | n=1,981          | n=571           | n=3,944          |                  |
| Age                               | 63.1 (±12.3)    | 70.3 (±12.3)     | 68.4 (±12.3)    | 63.2 (±11.4)     | <b>&lt;0.001</b> |
| Year                              |                 |                  |                 |                  | <b>&lt;0.001</b> |
| Before 1980                       | 19,073 (8.6%)   | 56 (2.8%)        | 46 (8.1%)       | 859 (21.8%)      |                  |
| 1980-9                            | 25,167 (11.4%)  | 224 (11.3%)      | 76 (13.3%)      | 949 (24.1%)      |                  |
| 1990-9                            | 36,708 (16.6%)  | 426 (21.5%)      | 112 (19.6%)     | 943 (23.9%)      |                  |
| 2000-9                            | 92,536 (41.9%)  | 771 (38.9%)      | 232 (40.6%)     | 1,076 (17.3%)    |                  |
| 2010 or later                     | 47,257 (21.4%)  | 504 (25.4%)      | 105 (18.4%)     | 117 (3.0%)       |                  |
| Race/ethnicity                    |                 |                  |                 |                  | <b>&lt;0.001</b> |
| White                             | 171,885 (77.9%) | 1,567 (79.1%)    | 460 (80.6%)     | 3,333 (84.5%)    |                  |
| Black                             | 16,027 (7.3%)   | 141 (7.1%)       | 57 (10.0%)      | 220 (5.6%)       |                  |
| Hispanic                          | 17,018 (7.7%)   | 129 (6.5%)       | 30 (5.3%)       | 162 (4.1%)       |                  |
| Asian                             | 11,541 (5.2%)   | 114 (5.8%)       | 19 (3.3%)       | 182 (4.6%)       |                  |
| Others*                           | 4,270 (1.9%)    | 30 (1.5%)        | 5 (0.9%)        | 47 (1.2%)        |                  |
| Area                              |                 |                  |                 |                  | <b>&lt;0.001</b> |
| West                              | 113,719 (51.5%) | 958 (48.4%)      | 244 (42.7%)     | 1,903 (48.3%)    |                  |
| Central                           | 51,448 (23.3%)  | 543 (27.4%)      | 157 (27.5%)     | 1,149 (29.1%)    |                  |
| East                              | 55,574 (25.2%)  | 480 (24.2%)      | 170 (29.8%)     | 892 (22.6%)      |                  |
| Marital status                    |                 |                  |                 |                  | <b>&lt;0.001</b> |
| Single                            | 32,058 (14.5%)  | 181 (9.1%)       | 81 (14.2%)      | 454 (11.5%)      |                  |
| Married                           | 115,301 (52.2%) | 900 (45.4%)      | 275 (48.2%)     | 2,223 (56.4%)    |                  |
| Others*                           | 73,382 (33.2%)  | 900 (45.4%)      | 215 (37.7%)     | 1,267 (32.1%)    |                  |
| Histology types                   |                 |                  |                 |                  | <b>&lt;0.001</b> |
| Endometrioid                      | 172,784 (78.3%) | 1,416 (71.5%)    | 416 (72.9%)     | 3,250 (82.4%)    |                  |
| Serous                            | 13,975 (6.3%)   | 173 (8.7%)       | 55 (9.6%)       | 221 (5.6%)       |                  |
| Clear cell                        | 2,936 (1.3%)    | 45 (2.3%)        | 13 (2.3%)       | 41 (1.0%)        |                  |
| Carcinosarcoma                    | 10,664 (4.8%)   | 159 (8.0%)       | 28 (4.9%)       | 84 (2.1%)        |                  |
| Mixed                             | 7,318 (3.3%)    | 95 (4.8%)        | 17 (3.0%)       | 45 (1.1%)        |                  |
| Others                            | 13,064 (5.9%)   | 93 (4.7%)        | 42 (7.4%)       | 303 (7.7%)       |                  |
| Stage                             |                 |                  |                 |                  | <b>&lt;0.001</b> |
| I                                 | 144,074 (65.3%) | 1,223 (61.7%)    | 312 (54.6%)     | 2,443 (61.9%)    |                  |
| II                                | 9,672 (4.4%)    | 115 (5.8%)       | 32 (5.6%)       | 167 (4.2%)       |                  |
| III                               | 19,235 (8.7%)   | 213 (10.8%)      | 62 (10.9%)      | 213 (5.4%)       |                  |
| IV                                | 15,320 (6.9%)   | 147 (7.4%)       | 61 (10.7%)      | 104 (2.6%)       |                  |
| Unknown                           | 32,440 (14.7%)  | 283 (14.3%)      | 104 (18.2%)     | 1,017 (25.8%)    |                  |
| Grade                             |                 |                  |                 |                  | <b>&lt;0.001</b> |
| 1                                 | 81,211 (36.8%)  | 528 (26.7%)      | 168 (29.4%)     | 1,486 (37.7%)    |                  |
| 2                                 | 59,830 (27.1%)  | 552 (27.9%)      | 160 (28.0%)     | 1,280 (32.5%)    |                  |
| 3                                 | 46,449 (21.0%)  | 569 (28.7%)      | 141 (24.7%)     | 635 (16.1%)      |                  |
| Unknown                           | 33,251 (15.1%)  | 332 (16.8%)      | 102 (17.9%)     | 543 (13.8%)      |                  |
| Tumor size                        |                 |                  |                 |                  | <b>&lt;0.001</b> |
| ≤2 cm                             | 21,049 (9.5%)   | 198 (10.0%)      | 46 (8.1%)       | 271 (6.9%)       |                  |
| >2 cm                             | 73,887 (33.5%)  | 702 (35.4%)      | 170 (29.8%)     | 846 (21.5%)      |                  |
| Unknown                           | 125,805 (57.0%) | 1,081 (54.6%)    | 355 (62.2%)     | 2,827 (71.7%)    |                  |
| Pelvic lymph node <sup>†</sup>    |                 |                  |                 |                  | <b>&lt;0.001</b> |
| Not involved                      | 177,567 (92.4%) | 1,528 (92.3%)    | 417 (92.1%)     | 2,833 (96.0%)    |                  |
| Involved                          | 14,562 (7.6%)   | 128 (7.7%)       | 36 (7.9%)       | 117 (4.0%)       |                  |
| Lymph node ratio (%) <sup>†</sup> | 20.0 (9.1-50.0) | 30.8 (12.5-56.3) | 29.4 (16.7-100) | 18.6 (10.0-38.2) | <b>0.008</b>     |
| Hysterectomy                      |                 |                  |                 |                  | <b>&lt;0.001</b> |
| No                                | 15,747 (7.1%)   | 260 (13.1%)      | 53 (9.3%)       | 90 (2.3%)        |                  |
| Yes                               | 176,095 (79.8%) | 1,596 (80.6%)    | 427 (74.8%)     | 2,644 (67.0%)    |                  |
| Unknown                           | 28,899 (13.1%)  | 125 (6.3%)       | 91 (15.9%)      | 1,210 (30.7%)    |                  |
| Radiotherapy                      |                 |                  |                 |                  | <b>&lt;0.001</b> |
| None                              | 151,650 (68.7%) | 1,444 (72.9%)    | 435 (76.2%)     | 2,373 (60.2%)    |                  |
| External beam                     | 45,860 (20.8%)  | 340 (17.2%)      | 105 (18.4%)     | 1,092 (27.7%)    |                  |

|          |               |            |           |            |
|----------|---------------|------------|-----------|------------|
| Implants | 12,860 (5.8%) | 128 (6.5%) | 19 (3.3%) | 136 (3.4%) |
| Both     | 6,632 (3.0%)  | 31 (1.6%)  | 5 (0.9%)  | 285 (7.2%) |
| Unknown  | 3,739 (1.7%)  | 38 (1.9%)  | 7 (1.2%)  | 58 (1.5%)  |

Number (percent per column), median (interquartile range), or mean (standard deviation) is shown. Cases without known time interval to secondary colorectal cancer were not included. Significant *P*-values are emboldened. \*including unknown cases. †among staged cases with available results. Abbreviation: CRC, secondary colorectal cancer.

**Supplemental Table S2. Patient demographics for endometrioid type endometrial cancer based on timing of secondary colorectal cancer.**

| Characteristic                    | No CRC          | Antecedent-CRC   | Synchronous-CRC | Postcedent-CRC  | P-value          |
|-----------------------------------|-----------------|------------------|-----------------|-----------------|------------------|
| Number                            | n=172,784       | n=1,416          | n=416           | n=3,250         |                  |
| Age                               | 62.3 (±12.2)    | 69.4 (±12.7)     | 68.2 (±12.4)    | 63.1 (±11.4)    | <b>&lt;0.001</b> |
| Year                              |                 |                  |                 |                 | <b>&lt;0.001</b> |
| Before 1980                       | 14,821 (8.6%)   | 47 (3.3%)        | 39 (9.4%)       | 679 (20.9%)     |                  |
| 1980-9                            | 19,422 (11.2%)  | 162 (11.4%)      | 46 (11.1%)      | 769 (23.7%)     |                  |
| 1990-9                            | 29,267 (16.9%)  | 330 (23.3%)      | 78 (18.8%)      | 788 (24.2%)     |                  |
| 2000-9                            | 73,062 (42.3%)  | 535 (37.8%)      | 177 (42.5%)     | 918 (28.2%)     |                  |
| 2010 or later                     | 36,212 (21.0%)  | 342 (24.2%)      | 76 (18.3%)      | 96 (3.0%)       |                  |
| Race/ethnicity                    |                 |                  |                 |                 | <b>&lt;0.001</b> |
| White                             | 137,422 (79.5%) | 1,143 (80.7%)    | 344 (82.7%)     | 2,767 (85.1%)   |                  |
| Black                             | 9,801 (5.7%)    | 84 (5.9%)        | 36 (8.7%)       | 169 (5.2%)      |                  |
| Hispanic                          | 13,090 (7.6%)   | 88 (6.2%)        | 23 (5.5%)       | 135 (4.2%)      |                  |
| Asian                             | 8,980 (5.2%)    | 77 (5.4%)        | 8 (1.9%)        | 140 (4.3%)      |                  |
| Others*                           | 3,491 (2.0%)    | 24 (1.7%)        | 5 (1.2%)        | 39 (1.2%)       |                  |
| Area                              |                 |                  |                 |                 | <b>&lt;0.001</b> |
| West                              | 89,070 (51.5%)  | 673 (47.5%)      | 176 (42.3%)     | 1,559 (48.0%)   |                  |
| Central                           | 40,364 (23.4%)  | 405 (28.6%)      | 118 (28.4%)     | 949 (29.2%)     |                  |
| East                              | 43,350 (25.1%)  | 338 (23.9%)      | 122 (29.3%)     | 742 (22.8%)     |                  |
| Marital status                    |                 |                  |                 |                 | <b>&lt;0.001</b> |
| Single                            | 25,190 (14.6%)  | 143 (10.1%)      | 66 (15.9%)      | 367 (11.3%)     |                  |
| Married                           | 92,356 (53.5%)  | 655 (46.3%)      | 199 (47.8%)     | 1,840 (56.6%)   |                  |
| Others*                           | 55,238 (32.0%)  | 618 (43.6%)      | 151 (36.3%)     | 1,043 (32.1%)   |                  |
| Stage                             |                 |                  |                 |                 | <b>&lt;0.001</b> |
| I                                 | 122,613 (71.0%) | 942 (66.5%)      | 256 (61.5%)     | 2,107 (64.8%)   |                  |
| II                                | 7,150 (4.1%)    | 71 (5.0%)        | 19 (4.6%)       | 132 (4.1%)      |                  |
| III                               | 11,799 (6.8%)   | 118 (8.3%)       | 38 (9.1%)       | 160 (4.9%)      |                  |
| IV                                | 7,481 (4.3%)    | 68 (4.8%)        | 29 (7.0%)       | 63 (1.9%)       |                  |
| Unknown                           | 23,741 (13.7%)  | 217 (15.3%)      | 74 (17.8%)      | 788 (24.2%)     |                  |
| Grade                             |                 |                  |                 |                 | <b>&lt;0.001</b> |
| 1                                 | 74,723 (43.2%)  | 486 (34.3%)      | 158 (38.0%)     | 1,357 (41.8%)   |                  |
| 2                                 | 51,960 (30.1%)  | 474 (33.5%)      | 129 (31.0%)     | 1,112 (34.2%)   |                  |
| 3                                 | 25,804 (14.9%)  | 270 (19.1%)      | 72 (17.3%)      | 419 (12.9%)     |                  |
| Unknown                           | 20,297 (11.7%)  | 186 (13.1%)      | 57 (13.7%)      | 362 (11.1%)     |                  |
| Tumor size                        |                 |                  |                 |                 | <b>&lt;0.001</b> |
| ≤2 cm                             | 17,671 (10.2%)  | 150 (10.6%)      | 35 (8.4%)       | 239 (7.4%)      |                  |
| >2 cm                             | 54,554 (31.6%)  | 442 (31.2%)      | 117 (28.1%)     | 675 (20.8%)     |                  |
| Unknown                           | 100,559 (58.2%) | 824 (58.2%)      | 264 (63.5%)     | 2,336 (71.9%)   |                  |
| Pelvic lymph node <sup>†</sup>    |                 |                  |                 |                 | <b>&lt;0.001</b> |
| Not involved                      | 177,567 (95.7%) | 1,528 (95.7%)    | 417 (94.8%)     | 2,833 (97.3%)   |                  |
| Involved                          | 7,946 (4.3%)    | 69 (4.3%)        | 23 (5.2%)       | 78 (2.7%)       |                  |
| Lymph node ratio (%) <sup>†</sup> | 16.7 (8.1-40.0) | 23.0 (10.0-53.4) | 29.4 (16.7-100) | 13.4 (9.3-25.0) | <b>0.036</b>     |
| Hysterectomy                      |                 |                  |                 |                 | <b>&lt;0.001</b> |
| No                                | 11,489 (6.6%)   | 190 (13.4%)      | 42 (10.1%)      | 76 (2.3%)       |                  |
| Yes                               | 139,191 (80.6%) | 1,127 (79.6%)    | 309 (74.3%)     | 2,215 (68.2%)   |                  |
| Unknown                           | 22,104 (12.8%)  | 99 (7.0%)        | 65 (15.6%)      | 959 (29.5%)     |                  |
| Radiotherapy                      |                 |                  |                 |                 | <b>&lt;0.001</b> |
| None                              | 122,788 (71.1%) | 1,070 (75.6%)    | 326 (78.4%)     | 2,007 (61.8%)   |                  |
| External beam                     | 32,440 (18.8%)  | 222 (15.7%)      | 68 (16.3%)      | 844 (26.0%)     |                  |
| Implants                          | 9,822 (5.7%)    | 80 (5.6%)        | 15 (3.6%)       | 126 (3.9%)      |                  |
| Both                              | 5,110 (3.0%)    | 22 (1.6%)        | 4 (1.0%)        | 228 (7.0%)      |                  |
| Unknown                           | 2,624 (1.5%)    | 22 (1.6%)        | 3 (0.7%)        | 45 (1.4%)       |                  |

Number (percent per column), median (interquartile range), or mean (standard deviation) is shown. Significant *P*-values are emboldened. Cases without known time interval to secondary colorectal cancer were not included. \*including unknown cases. †among staged cases with available results. Abbreviation: CRC, secondary colorectal cancer.



**Supplemental Table S3. Temporal trends of age at the index cancer diagnosis based on presence of secondary primary cancer (for Figure 1A-B).**

| Cohort     | SPC | Segment | Lower Endpoint | Upper Endpoint | APC  | Lower CI | Upper CI | Test Statistic | <i>P</i> -value  |
|------------|-----|---------|----------------|----------------|------|----------|----------|----------------|------------------|
| Uterine    | Yes | 1       | 1973           | 1991           | 0.7  | 0.5      | 0.8      | 8.7            | <b>&lt;0.001</b> |
|            |     | 2       | 1991           | 2013           | 0.0  | -0.1     | 0.1      | 0.7            | 0.48             |
|            | No  | 1       | 1973           | 1983           | 0.6  | 0.5      | 0.7      | 14.4           | <b>&lt;0.001</b> |
|            |     | 2       | 1983           | 1992           | 0.1  | 0        | 0.2      | 1.5            | 0.14             |
|            |     | 3       | 1992           | 2007           | -0.3 | -0.3     | -0.3     | -15.2          | <b>&lt;0.001</b> |
|            |     | 4       | 2007           | 2013           | 0.1  | 0        | 0.2      | 1.4            | 0.18             |
| Colorectal | Yes | 1       | 1973           | 1994           | 0.6  | 0.5      | 0.7      | 9.1            | <b>&lt;0.001</b> |
|            |     | 2       | 1994           | 2013           | -0.1 | -0.2     | 0.0      | -2.2           | <b>0.032</b>     |
|            | No  | 1       | 1973           | 1986           | 0.3  | 0.3      | 0.3      | 14.8           | <b>&lt;0.001</b> |
|            |     | 2       | 1986           | 1998           | 0.0  | -0.1     | 0.0      | -0.7           | 0.51             |
|            |     | 3       | 1998           | 2013           | -0.4 | -0.4     | -0.3     | -33.6          | <b>&lt;0.001</b> |

Significant *P*-values are emboldened. Abbreviations: SPC, secondary primary cancer; APC, annual rate of percent change, and CI, confidence interval.

**Supplemental Table S4. Temporal trends for secondary primary cancer per year (for Figure 2A-B).**

| Cohort     | SPC Timing  | Segment | Lower Endpoint | Upper Endpoint | APC   | Lower CI | Upper CI | Test Statistic | P-value          |
|------------|-------------|---------|----------------|----------------|-------|----------|----------|----------------|------------------|
| Uterine    | Any timing  | 1       | 1973           | 1992           | -0.4  | -1.2     | 0.4      | -0.9           | 0.36             |
|            |             | 2       | 1992           | 2013           | -5.4  | -6.0     | -4.9     | -19            | <b>&lt;0.001</b> |
|            | Antecedent  | 1       | 1973           | 1990           | 10.7  | 6.1      | 15.5     | 4.9            | <b>&lt;0.001</b> |
|            |             | 2       | 1990           | 2001           | -5.6  | -10.3    | -0.6     | -2.3           | <b>0.029</b>     |
|            |             | 3       | 2001           | 2013           | 3.2   | 0.7      | 5.9      | 2.6            | <b>0.014</b>     |
|            | Synchronous | 1       | 1973           | 1979           | 23.7  | 1.1      | 51.3     | 2.1            | <b>0.039</b>     |
|            |             | 2       | 1979           | 2013           | -1.6  | -2.5     | -0.8     | -3.7           | <b>&lt;0.001</b> |
|            | Postcedent  | 1       | 1973           | 1995           | -2.2  | -3       | -1.5     | -6             | <b>&lt;0.001</b> |
|            |             | 2       | 1995           | 2009           | -9.3  | -11.1    | -7.6     | -10.4          | <b>&lt;0.001</b> |
|            |             | 3       | 2009           | 2013           | -38.1 | -52      | -20.3    | -3.9           | <b>&lt;0.001</b> |
| Colorectal | Any timing  | 1       | 1973           | 1986           | 5.7   | 3.6      | 8.0      | 5.5            | <b>&lt;0.001</b> |
|            |             | 2       | 1986           | 1998           | 0.4   | -1.3     | 2.2      | 0.5            | 0.64             |
|            |             | 3       | 1998           | 2001           | -10.6 | -27.3    | 9.9      | -1.1           | 0.28             |
|            |             | 4       | 2001           | 2013           | 0.2   | -1.0     | 1.3      | 0.3            | 0.79             |
|            | Antecedent  | 1       | 1973           | 1986           | 13    | 8.4      | 17.8     | 6              | <b>&lt;0.001</b> |
|            |             | 2       | 1986           | 1998           | 1.7   | -0.8     | 4.2      | 1.4            | 0.17             |
|            |             | 3       | 1998           | 2001           | -16.2 | -37.5    | 12.3     | -1.2           | 0.23             |
|            |             | 4       | 2001           | 2013           | 4.2   | 2.8      | 5.8      | 5.9            | <b>&lt;0.001</b> |
|            | Synchronous | 1       | 1973           | 2013           | -0.2  | -1.0     | 0.6      | -0.5           | 0.60             |
|            | Postcedent  | 1       | 1973           | 2001           | -0.7  | -1.3     | -0.1     | -2.5           | <b>0.016</b>     |
|            |             | 2       | 2001           | 2011           | -9.5  | -11.8    | -7.0     | -7.7           | <b>&lt;0.001</b> |
|            |             | 3       | 2011           | 2013           | -63.2 | -85.8    | -4.7     | -2.1           | <b>0.04</b>      |

Significant *P*-values are emboldened. Abbreviations: SPC, secondary primary cancer; APC, annual rate of percent change, and CI, confidence interval.

**Supplemental Table S5. Temporal trends for secondary primary cancer in long-term follow-up cases (for Figure 3A).**

| Cohort     | Follow-up | Segment | Lower Endpoint | Upper Endpoint | APC   | Lower CI | Upper CI | Test Statistic | <i>P</i> -value  |
|------------|-----------|---------|----------------|----------------|-------|----------|----------|----------------|------------------|
| Uterine    | ≥5yr      | 1       | 1973           | 1981           | 0.8   | -2.5     | 4.3      | 0.5            | 0.63             |
|            |           | 2       | 1981           | 1995           | -3.1  | -4.7     | -1.4     | -3.8           | <b>&lt;0.001</b> |
|            |           | 3       | 1995           | 2008           | -10.5 | -12.3    | -8.7     | -11.4          | <b>&lt;0.001</b> |
|            | ≥10yr     | 1       | 1973           | 1982           | 0.8   | -2.1     | 3.8      | 0.6            | 0.57             |
|            |           | 2       | 1982           | 1995           | -4.1  | -6.0     | -2.1     | -4.2           | <b>&lt;0.001</b> |
|            |           | 3       | 1995           | 2003           | -10.8 | -14.5    | -7       | -5.7           | <b>&lt;0.001</b> |
| Colorectal | ≥5yr      | 1       | 1973           | 2001           | -2.2  | -2.8     | -1.5     | -7.1           | <b>&lt;0.001</b> |
|            |           | 2       | 2001           | 2008           | -11   | -14.4    | -7.4     | -6             | <b>&lt;0.001</b> |
|            | ≥10yr     | 1       | 1973           | 2003           | -2.6  | -3.2     | -2       | -8.9           | <b>&lt;0.001</b> |

Significant *P*-values are emboldened. Abbreviations: yr, years; SPC, secondary primary cancer; APC, annual rate of percent change, and CI, confidence interval.

**Supplemental Table S6. Temporal trends of SIR for secondary primary cancer (for Figure 3B).**

| Cohort     | Follow-up | Segment | Lower Endpoint | Upper Endpoint | APC  | Lower CI | Upper CI | Test Statistic | <i>P</i> -value  |
|------------|-----------|---------|----------------|----------------|------|----------|----------|----------------|------------------|
| Colorectal | ≥5yr      | 1       | 1975           | 1986           | 0.6  | 0.1      | 1.2      | 2.3            | <b>0.027</b>     |
|            |           | 2       | 1986           | 2002           | -0.9 | -1.2     | -0.6     | -6.5           | <b>&lt;0.001</b> |
|            |           | 3       | 200            | 2008           | -3.5 | -4.8     | -2.2     | -5.3           | <b>&lt;0.001</b> |
|            | ≥10yr     | 1       | 1975           | 1986           | 0.6  | -0.2     | 1.3      | 1.6            | 0.12             |
|            |           | 2       | 1986           | 2003           | -1.0 | -1.4     | -0.7     | -5.9           | <b>&lt;0.001</b> |
|            |           |         |                |                |      |          |          |                |                  |
| Uterine    | ≥5yr      | 1       | 1975           | 1995           | -0.4 | -0.7     | -0.1     | -3.2           | <b>0.003</b>     |
|            |           | 2       | 1995           | 2008           | -2.8 | -3.2     | -2.3     | -12.4          | <b>&lt;0.001</b> |
|            | ≥10yr     | 1       | 1975           | 1995           | -0.6 | -0.8     | -0.3     | -4.5           | <b>&lt;0.001</b> |
|            |           | 2       | 1995           | 2003           | -2.9 | -3.9     | -2.0     | -6.2           | <b>&lt;0.001</b> |

Significant *P*-values are emboldened. Abbreviations: yr, years; SPC, secondary primary cancer; APC, annual rate of percent change, and CI, confidence interval.

**Supplemental Table S7. Temporal trends for secondary primary cancer per SPC timing (for Supplemental Figure S3).**

| Cohort     | SPC Timing | Segment | Lower Endpoint | Upper Endpoint | APC   | Lower CI | Upper CI | Test Statistic | <i>P</i> -value  |
|------------|------------|---------|----------------|----------------|-------|----------|----------|----------------|------------------|
| Uterine    | <5yr       | 1       | 1973           | 2003           | 0.7   | -0.5     | 1.9      | 1.3            | 0.22             |
|            |            | 1       | 1973           | 1981           | 1.6   | -2.3     | 5.6      | 0.8            | 0.41             |
|            | ≥5yr       | 2       | 1981           | 1995           | -4.3  | -6.2     | -2.5     | -4.7           | <b>&lt;0.001</b> |
|            |            | 3       | 1995           | 2003           | -14.5 | -18.7    | -10.1    | -6.4           | <b>&lt;0.001</b> |
| Colorectal | <5yr       | 1       | 1973           | 2003           | -1.0  | -2.1     | 0.2      | -1.7           | 0.09             |
|            | ≥5yr       | 1       | 1973           | 1984           | 1.4   | -2.4     | 5.4      | 0.8            | 0.45             |
|            |            | 2       | 1984           | 2003           | -4.8  | -5.9     | -3.6     | -8.5           | <b>&lt;0.001</b> |

Significant *P*-values are emboldened. Abbreviations: yr, years; SPC, secondary primary cancer; APC, annual rate of percent change, and CI, confidence interval.

**Supplemental Table S8. Temporal trends for secondary primary cancer per age (for Figure 4A-B).**

| Cohort     | SPC Timing  | Segment | Lower Endpoint | Upper Endpoint | APC   | Lower CI | Upper CI | Test Statistic | P-value          |
|------------|-------------|---------|----------------|----------------|-------|----------|----------|----------------|------------------|
| uterine    | Any timing  | 1       | 30             | 34             | 45.9  | 0.5      | 112.0    | 2              | <b>0.047</b>     |
|            |             | 2       | 34             | 60             | 0.0   | -0.7     | 0.8      | 0.1            | 0.96             |
|            |             | 3       | 60             | 66             | 6.2   | 1.7      | 10.9     | 2.8            | <b>0.007</b>     |
|            |             | 4       | 66             | 95             | 1.1   | 0.6      | 1.6      | 4.5            | <b>&lt;0.001</b> |
|            | Antecedent  | 1       | 30             | 60             | 1.7   | 0.3      | 3.2      | 2.4            | <b>0.021</b>     |
|            |             | 2       | 60             | 88             | 6.1   | 5.4      | 6.8      | 19.1           | <b>&lt;0.001</b> |
|            |             | 3       | 88             | 95             | -2.6  | -9.9     | 5.4      | -0.7           | 0.51             |
|            | Synchronous | 1       | 36             | 54             | -1.6  | -5.9     | 2.9      | -0.7           | 0.47             |
|            |             | 2       | 54             | 95             | 4.2   | 3.3      | 5.1      | 9.4            | <b>&lt;0.001</b> |
|            | Postcedent  | 1       | 30             | 34             | 43.4  | -14.9    | 141.5    | 1.4            | 0.17             |
|            |             | 2       | 34             | 75             | 0.9   | 0.4      | 1.3      | 3.7            | <b>&lt;0.001</b> |
|            |             | 3       | 75             | 95             | -5.3  | -7.7     | -2.8     | -4.2           | <b>&lt;0.001</b> |
| Colorectal | Any timing  | 1       | 30             | 35             | 19.5  | -2.9     | 47       | 1.7            | 0.09             |
|            |             | 2       | 35             | 66             | 1.5   | 0.9      | 2.0      | 5.7            | <b>&lt;0.001</b> |
|            |             | 3       | 66             | 83             | -1.4  | -2.1     | -0.7     | -4.1           | <b>&lt;0.001</b> |
|            |             | 4       | 83             | 95             | -4.7  | -6.5     | -2.9     | -5.1           | <b>&lt;0.001</b> |
|            | Antecedent  | 1       | 36             | 57             | 5.4   | 3.1      | 7.8      | 4.7            | <b>&lt;0.001</b> |
|            |             | 2       | 57             | 79             | 1.6   | 0.8      | 2.4      | 4.1            | <b>&lt;0.001</b> |
|            |             | 3       | 79             | 95             | -2.4  | -3.8     | -0.9     | -3.3           | <b>0.002</b>     |
|            | Synchronous | 1       | 36             | 66             | 1.0   | -0.7     | 2.7      | 1.2            | 0.23             |
|            |             | 2       | 66             | 95             | -3.1  | -4.6     | -1.6     | -4.2           | <b>&lt;0.001</b> |
|            | Postcedent  | 1       | 30             | 65             | -0.6  | -1.2     | 0.1      | -1.6           | 0.11             |
|            |             | 2       | 65             | 78             | -4.7  | -6.7     | -2.8     | -4.8           | <b>&lt;0.001</b> |
|            |             | 3       | 78             | 95             | -10.4 | -13.3    | -7.4     | -6.8           | <b>&lt;0.001</b> |

Significant *P*-values are emboldened. Abbreviations: APC, annual rate of percent change, and CI, confidence interval.

**Supplemental Table S9. Temporal trends for secondary primary cancer-specific survival among survivors (for Supplemental Figure S6).**

| Cohort     | Follow-up | Segment | Lower Endpoint | Upper Endpoint | APC   | Lower CI | Upper CI | Test Statistic | P-value          |
|------------|-----------|---------|----------------|----------------|-------|----------|----------|----------------|------------------|
| Colorectal | ≥5yr      | 1       | 1973           | 1994           | -2    | -4.6     | 0.8      | -1.5           | 0.15             |
|            |           | 2       | 1994           | 2006           | -12   | -18      | -5.6     | -3.7           | <b>&lt;0.001</b> |
|            | ≥10yr     | 1       | 1973           | 1984           | -4    | -10.2    | 2.6      | -1.4           | 0.20             |
|            |           | 1       | 1986           | 1997           | -8.6  | -16.3    | -0.1     | -2.3           | <b>0.047</b>     |
| Uterine    | ≥5yr      | 1       | 1973           | 1982           | 0.1   | -3.3     | 3.7      | 0.1            | 0.95             |
|            |           | 2       | 1982           | 2001           | -6.6  | -7.9     | -5.2     | -9.4           | <b>&lt;0.001</b> |
|            |           | 3       | 2001           | 2008           | -29.9 | -37.7    | -21.2    | -6.2           | <b>&lt;0.001</b> |
|            | ≥10yr     | 1       | 1973           | 1981           | -0.6  | -5.8     | 4.8      | -0.2           | 0.81             |
|            |           | 2       | 1981           | 1995           | -6.8  | -9.6     | -3.8     | -4.7           | <b>&lt;0.001</b> |
|            |           | 3       | 1995           | 2003           | -21.1 | -29.3    | -12      | -4.5           | <b>&lt;0.001</b> |

Significant *P*-values are emboldened. Abbreviations: APC, annual rate of percent change, and CI, confidence interval.

**Supplemental Table S10. Temporal trends for secondary colorectal cancer among endometrial cancer (for Supplemental Figure S7A).**

| SPC Timing  | Segment | Lower Endpoint | Upper Endpoint | APC   | Lower CI | Upper CI | Test Statistic | <i>P</i> -value  |
|-------------|---------|----------------|----------------|-------|----------|----------|----------------|------------------|
| Any timing  | 1       | 1973           | 1992           | -0.4  | -1.2     | 0.5      | -0.9           | 0.38             |
|             | 2       | 1992           | 2013           | -5.5  | -6.1     | -5.0     | -19.0          | <b>&lt;0.001</b> |
| Antecedent  | 1       | 1973           | 1990           | 11.1  | 6.6      | 15.9     | 5.1            | <b>&lt;0.001</b> |
|             | 2       | 1990           | 2001           | -5.7  | -10.3    | -0.8     | -2.4           | <b>0.024</b>     |
|             | 3       | 2001           | 2013           | 3.0   | 0.5      | 5.6      | 2.4            | <b>0.021</b>     |
| Synchronous | 1       | 1973           | 1978           | 35.2  | -2.4     | 87.1     | 1.9            | 0.07             |
|             | 2       | 1978           | 2013           | -1.5  | -2.4     | -0.7     | -3.5           | <b>0.001</b>     |
| Postcedent  | 1       | 1973           | 1995           | -2.3  | -3.0     | -1.5     | -6.0           | <b>&lt;0.001</b> |
|             | 2       | 1995           | 2009           | -9.3  | -11.1    | -7.5     | -10.1          | <b>&lt;0.001</b> |
|             | 3       | 2009           | 2013           | -38.2 | -52.1    | -20.3    | -3.8           | <b>&lt;0.001</b> |

Significant *P*-values are emboldened. Abbreviations: APC, annual rate of percent change, and CI, confidence interval.



**Supplemental Table S11. Temporal trends for postcedent colorectal cancer in long-term follow-up cases with endometrial cancer (for Supplemental Figure S7B).**

| Follow-up | Segment | Lower Endpoint | Upper Endpoint | APC   | Lower CI | Upper CI | Test Statistic | <i>P</i> -value  |
|-----------|---------|----------------|----------------|-------|----------|----------|----------------|------------------|
| ≥5yr      | 1       | 1973           | 1981           | 1.0   | -2.4     | 4.6      | 0.6            | 0.56             |
|           | 2       | 1981           | 1995           | -3.2  | -4.8     | -1.5     | -3.9           | <b>&lt;0.001</b> |
|           | 3       | 1995           | 2008           | -10.5 | -12.3    | -8.7     | -11.2          | <b>&lt;0.001</b> |
| ≥10yr     | 1       | 1973           | 1981           | 1.6   | -2.1     | 5.3      | 0.9            | 0.39             |
|           | 2       | 1981           | 1995           | -4.0  | -5.7     | -2.2     | -4.7           | <b>&lt;0.001</b> |
|           | 3       | 1995           | 2003           | -10.8 | -14.5    | -6.9     | -5.5           | <b>&lt;0.001</b> |

Significant *P*-values are emboldened. Abbreviations: APC, annual rate of percent change, and CI, confidence interval.

**Supplemental Table S12. Temporal trends for secondary colorectal cancer among endometrioid type endometrial cancer (for Supplemental Figure S8A).**

| SPC Timing  | Segment | Lower Endpoint | Upper Endpoint | APC   | Lower CI | Upper CI | Test Statistic | <i>P</i> -value  |
|-------------|---------|----------------|----------------|-------|----------|----------|----------------|------------------|
| Any timing  | 1       | 1973           | 1994           | -0.8  | -1.4     | -0.1     | -2.4           | <b>0.023</b>     |
|             | 2       | 1994           | 2013           | -6.3  | -7.0     | -5.7     | -18.4          | <b>&lt;0.001</b> |
| Antecedent  | 1       | 1973           | 1990           | 10.9  | 6.1      | 16       | 4.7            | <b>&lt;0.001</b> |
|             | 2       | 1990           | 2001           | -6.2  | -11.0    | -1.2     | -2.5           | <b>0.018</b>     |
|             | 3       | 2001           | 2013           | 2.5   | -0.3     | 5.3      | 1.8            | 0.08             |
| Synchronous | 1       | 1973           | 2013           | -0.7  | -1.7     | 0.2      | -1.6           | 0.11             |
| Postcedent  | 1       | 1973           | 1999           | -2.8  | -3.4     | -2.1     | -8.4           | <b>&lt;0.001</b> |
|             | 2       | 1999           | 2010           | -12.2 | -14.7    | -9.7     | -9.2           | <b>&lt;0.001</b> |
|             | 3       | 2010           | 2013           | -46.6 | -68.8    | -8.4     | -2.4           | <b>0.024</b>     |

Significant *P*-values are emboldened. Abbreviations: APC, annual rate of percent change, and CI, confidence interval.

**Supplemental Table S13. Temporal trends for postcedent colorectal cancer in long-term follow-up cases with endometrioid type endometrial cancer (for Supplemental Figure S8B).**

| Follow-up | Segment | Lower Endpoint | Upper Endpoint | APC   | Lower CI | Upper CI | Test Statistic | <i>P</i> -value  |
|-----------|---------|----------------|----------------|-------|----------|----------|----------------|------------------|
| ≥5yr      | 1       | 1973           | 1982           | 1.1   | -2       | 4.3      | 0.7            | 0.48             |
|           | 2       | 1982           | 1999           | -4.4  | -5.7     | -3.0     | -6.5           | <b>&lt;0.001</b> |
|           | 3       | 1999           | 2008           | -12.6 | -15.4    | -9.7     | -8.4           | <b>&lt;0.001</b> |
| ≥10yr     | 1       | 1973           | 1983           | 1.4   | -1.0     | 3.8      | 1.2            | 0.24             |
|           | 2       | 1983           | 1990           | -8.5  | -13.9    | -2.8     | -3.1           | <b>0.006</b>     |
|           | 3       | 1990           | 1993           | 8.1   | -25.3    | 56.6     | 0.4            | 0.66             |
|           | 4       | 1993           | 2003           | -10.1 | -12.4    | -7.8     | -8.7           | <b>&lt;0.001</b> |

Significant *P*-values are emboldened. Abbreviations: APC, annual rate of percent change, and CI, confidence interval.
